# Supplementary material for: Vascular synovial phenotype indicates poor response to JAK inhibitors in rheumatoid arthritis patients: a pilot study
Source: PeerJ. 2024 Nov 29;12:e18631. doi: 10.7717/peerj.18631 (PMC11610464; doi:10.7717/peerj.18631)
Supplement: Supplemental Information 1 [file peerj-12-18631-s001.xlsx]

## Sheet: Sheet1
pation	joint	sex	age	duration	JAK	Xray	RF	ACPA	ESR	CRP	SJC28	TJC28	VAS	DAS28-CRP	synovialhyperplasia	stromalactivity	IC	neovasculation	CD3	CD20	CD68	CD138	MP	MTX	HCQ
1	4	1	52	24	0	1	28.93	55.5	13	3.47	2	2	50	3.61198	0	1	1	1	500	300	99	200	1	1	1
2	2	1	54	108	0	0	37.5	32.9	65	24.99	2	2	70	4.30072	1	1	3	1	800	800	50	400	1	1	1
3	4	1	47	5	0	0	53.34	0	20	16.85	6	6	70	5.03509	1	3	3	1	80	50	80	50	0	1	1
4	1	0	57	36	0	2	445.96	25.5	74	103.26	4	5	74	5.77213	3	1	2	1	100	100	0	100	1	1	0
5	1	1	57	36	0	2	13.9	203	16	12.93	7	7	80	5.25069	0	1	2	1	200	100	300	50	1	0	0
6	1	0	55	36	0	0	0	800	67	11.04	9	9	70	5.35576	1	2	2	3	1700	1100	700	300	1	0	0
7	1	1	48	120	0	3	437	25.2	93	17.92	6	6	80	5.19605	0	1	1	2	20	20	80	100	1	1	0
8	3	0	73	24	0	2	141.57	800	45	32.96	4	4	70	4.88907	1	0	2	3	500	1000	400	0	1	1	0
9	1	0	36	36	0	1	2.6	0.5	5	4.71	2	2	58	3.68179	0	2	2	1	200	200	0	100	1	0	0
10	1	1	53	36	0	2	20	0.5	2	0.07	2	2	45	3.52723	1	1	1	1	300	300	80	80	1	0	0
11	1	1	65	6	0	1	11.18	0	60	27.72	1	3	65	4.32868	0	1	1	2	50	10	0	0	1	1	1
12	2	1	51	12	0	0	329	186	17	10.49	2	2	50	3.72687	1	1	3	2	900	900	0	500	1	0	1
13	2	1	60	108	0	1	77.99	35.8	21	6.51	2	2	59	3.71304	1	1	2	1	1000	1000	10	100	1	0	0
14	2	1	74	24	0	1	243.75	0	18	6.31	2	2	60	3.70407	0	1	1	2	20	0	0	0	0	1	1
15	1	1	54	24	0	1	20	0.5	18	6	1	1	65	3.39228	2	1	1	1	500	500	9	90	0	0	0
16	1	1	53	48	0	2	230.16	35.9	12	4.84	1	1	50	3.1353	2	1	1	1	200	200	0	50	1	1	1
17	1	1	47	72	0	0	2330	143	118	39.53	10	10	85	6.13905	1	2	3	1	500	500	100	200	1	0	0
18	1	0	62	288	0	2	1.24	0.5	63	33.8	2	2	70	4.1557	1	1	2	2	200	200	0	0	1	1	0
19	1	1	36	144	1	2	50.04	0	26	1.73	1	1	60	3.00155	1	1	1	2	120	50	0	0	1	1	1
20	2	0	61	60	1	0	228.91	800	17	2.34	2	2	60	3.42209	0	1	1	2	20	0	0	0	1	1	0
21	1	1	37	84	1	2	139.53	5.9	50	71.38	5	10	85	6.08847	1	1	2	3	300	150	180	40	0	1	0
22	1	1	62	216	1	2	88	146	12	6.37	1	1	50	3.21907	0	1	1	2	100	100	200	50	1	1	0
23	1	0	21	180	1	0	0	2.3	2	5.08	1	1	50	3.1498	1	1	1	2	30	30	50	10	0	1	1
24	1	1	71	360	1	2	65.8	699	29	9.57	3	3	60	4.10381	0	1	0	2	50	50	0	0	0	1	0
25	2	1	33	132	1	0	0	0	11	9.35	8	8	60	5.01719	0	2	2	2	800	400	300	100	1	1	1
26	1	1	62	60	1	2	251.52	0	55	99.19	6	6	80	5.79612	0	3	2	3	200	100	0	100	1	1	0
27	2	1	32	108	1	3	0	14.9	10	6.94	6	7	60	4.71337	1	1	2	2	180	80	50	50	1	1	1
